# Supplementary material for: A MOF-derived carbon host associated with Fe and Co single atoms for Li–Se batteries
Source: Royal Society of Chemistry journal article supplement (doi:10.1039/d1ta04529f), 2021-01-01
Supplement: d1ta04529f1.pdf [file d1ta04529f1.pdf]

## Supporting Information

### **A MOF-derived Carbon Host Associated with Fe and Co Single Atoms for Li-Se Batteries**

*Yuqing Cao<sup>a</sup>, Feifei Lei<sup>a</sup>, Yunliang Li<sup>a</sup>, Shilun Qiu<sup>a</sup>, Yan Wang<sup>b</sup>, Wei Zhang<sup>b</sup> and Zongtao Zhang<sup>a\*</sup>*

<sup>a</sup>State Key Laboratory of Inorganic Synthesis and Preparative Chemistry, College of Chemistry, Jilin University, Changchun 130012, China

<sup>b</sup>Electron Microscopy Center, Jilin University, Changchun 130012, China

\*Corresponding author

E-mail: z Zhang@jlu.edu.cn(Z. Zhang)

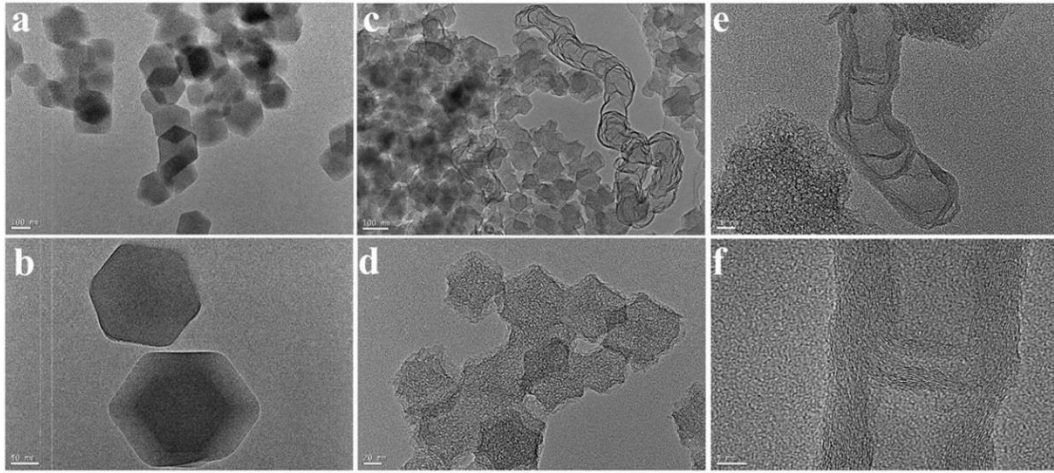

**Figure S1.** TEM images of (a)(b) ZIF-8@Fe-Co, (c)(d) APPC and (e)(f) generated carbon nanotubes during calcination. The scales are (a) 100 nm, (b) 10 nm, (c) 100 nm, (d) 20 nm, (e) 10 nm and (f) 5 nm, respectively.

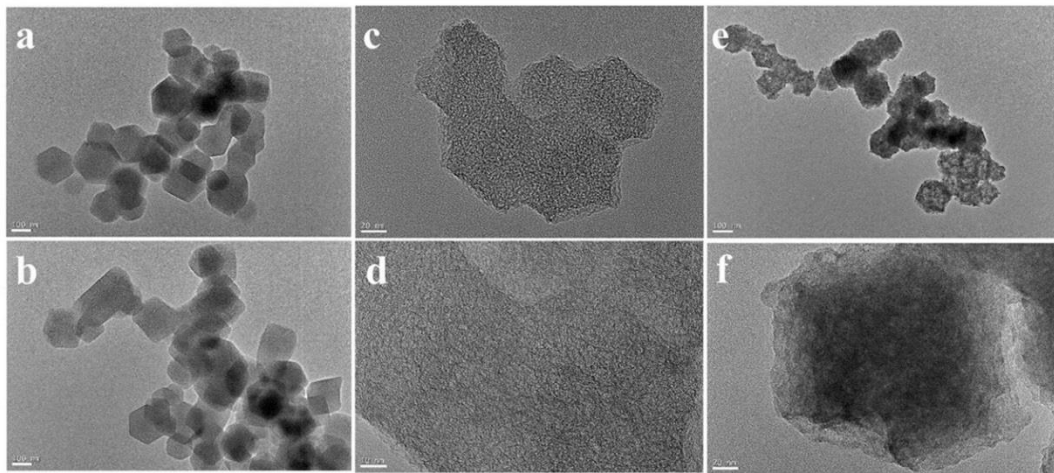

**Figure S2.** TEM images of (a)(b) ZIF-8, (c)(d) PC and (e)(f) PC/Se. The scales are: (a)(b)(e) 100 nm; (c)(f) 20 nm; (d) 10 nm.

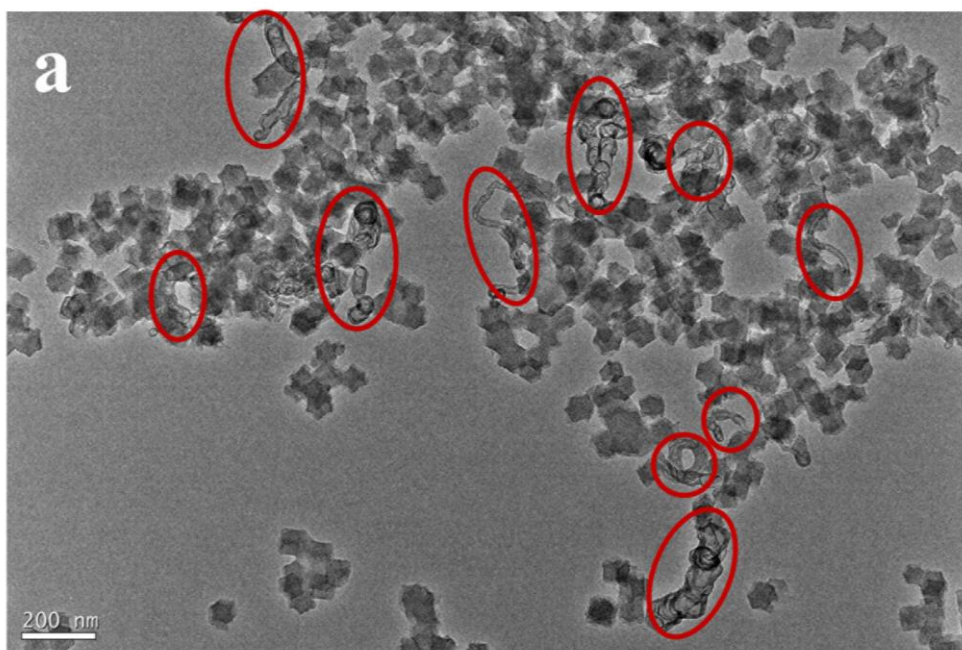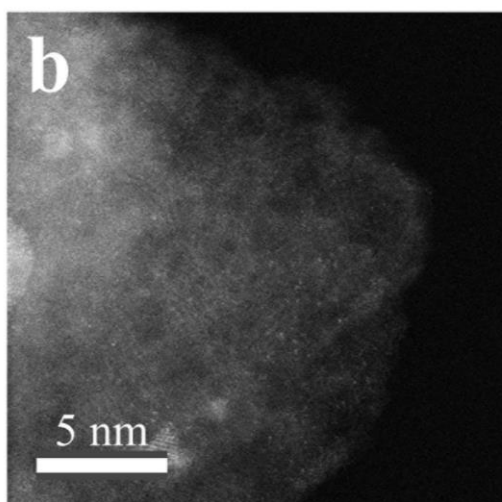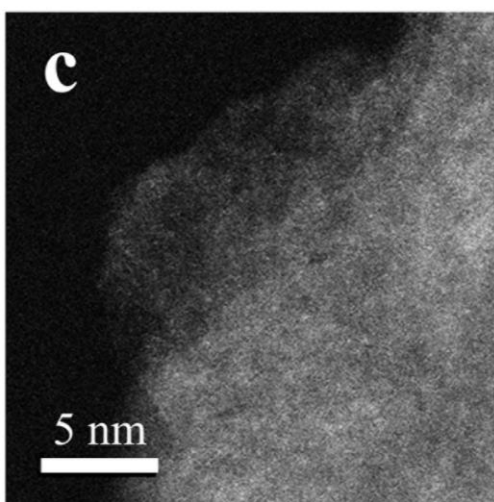

**Figure S3.** (a) TEM images of APPC and CNTs highlighted by red circles. (b) (c) Atomic-level HAADF-STEM images of APPC.



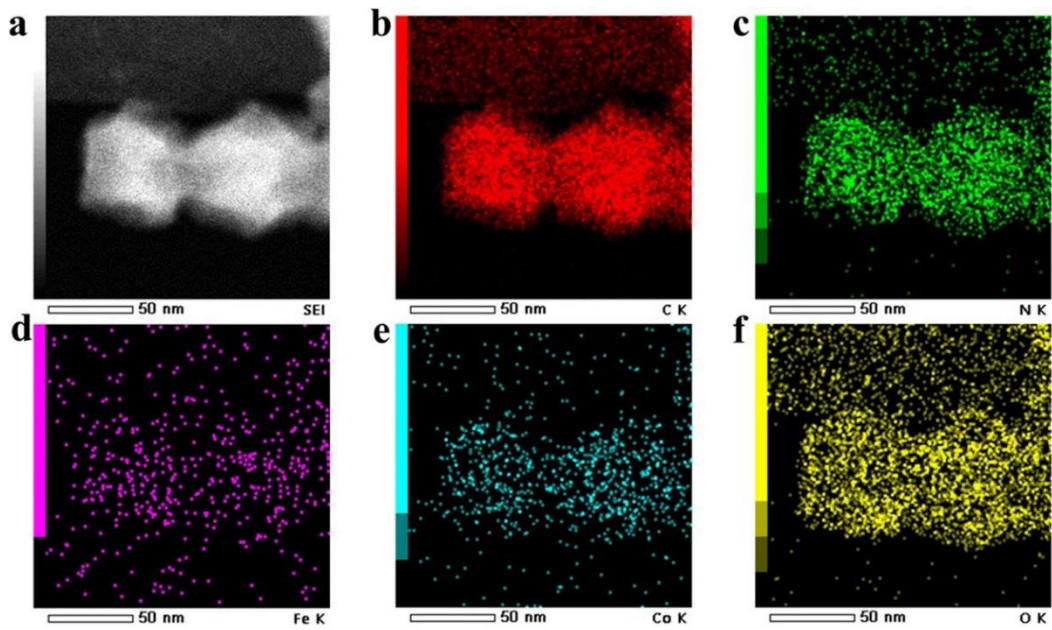

**Figure S4.** (a) STEM image of APPC and (b-f) EDS elemental maps of C, N, Fe, Co and O, respectively.

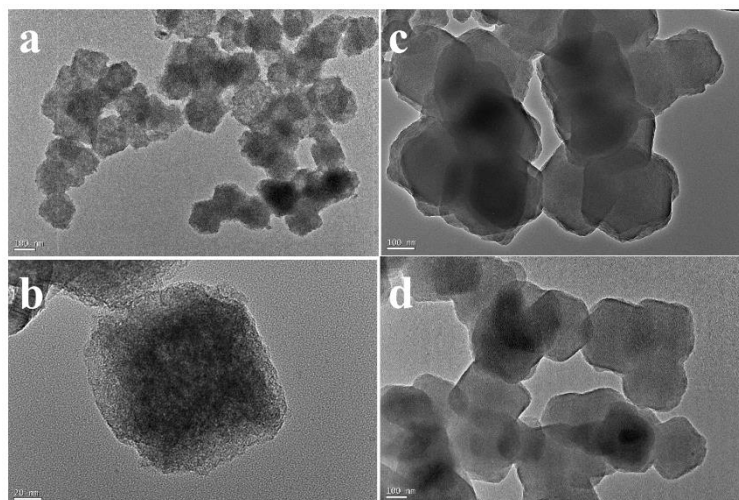

**Figure S5.** TEM images of (a)(b) APPC/Se, (c)(d) APPC/Se@PDA. The scales are 20 nm for (b), 100 nm for others, respectively.

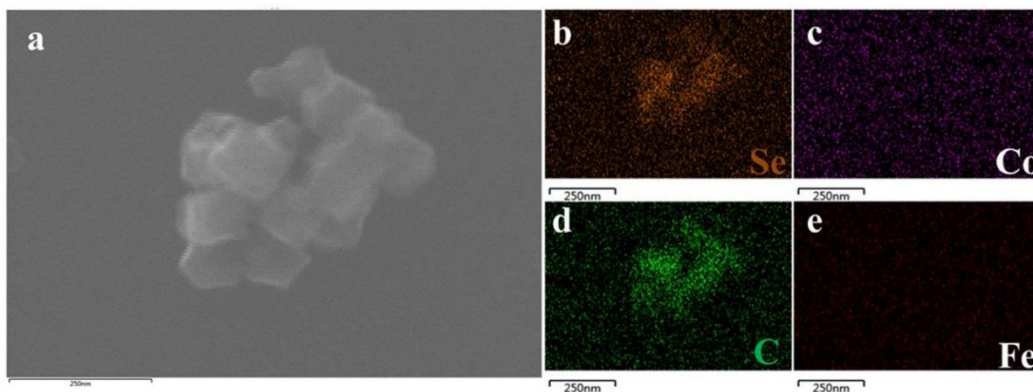

**Figure S6.** (a) SEM image of PC/Se and (b-e) EDS elemental maps of Se, Co, C and Fe, respectively. The scale of (a) is 250 nm.

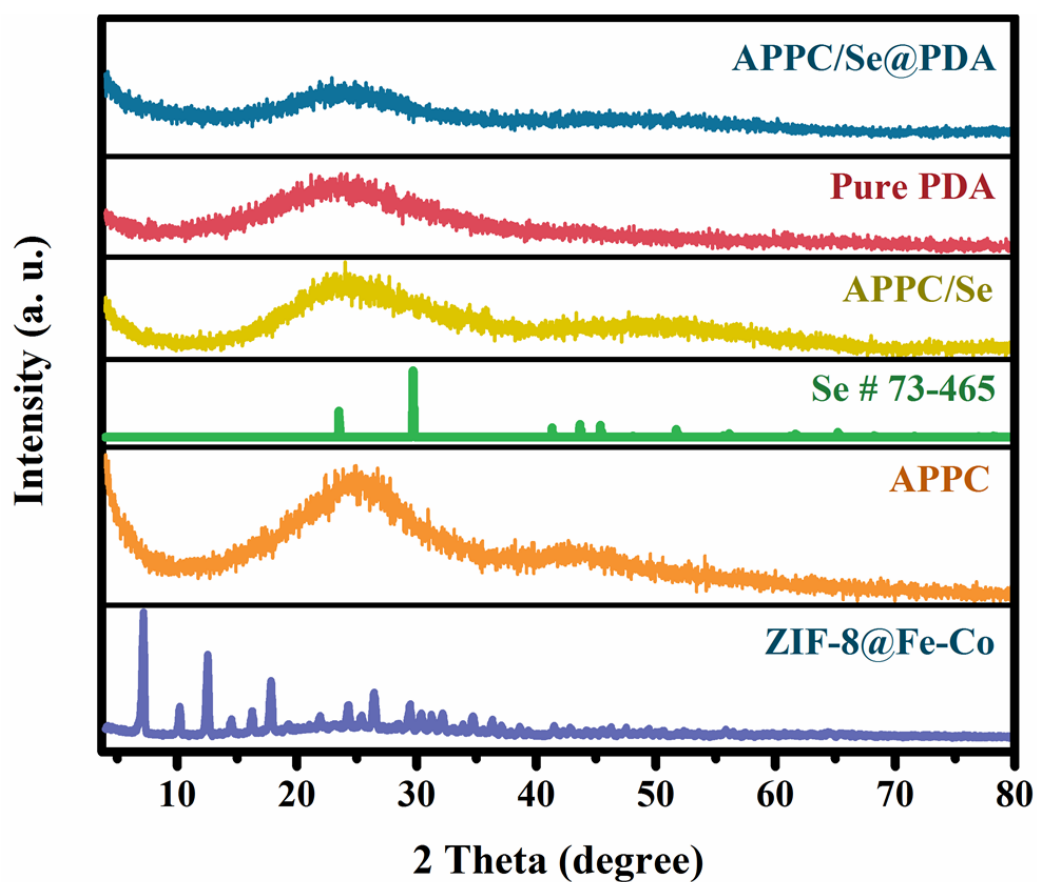

**Figure S7.** XRD patterns of APPC/Se@PDA, APPC/Se, APPC and pure PDA.

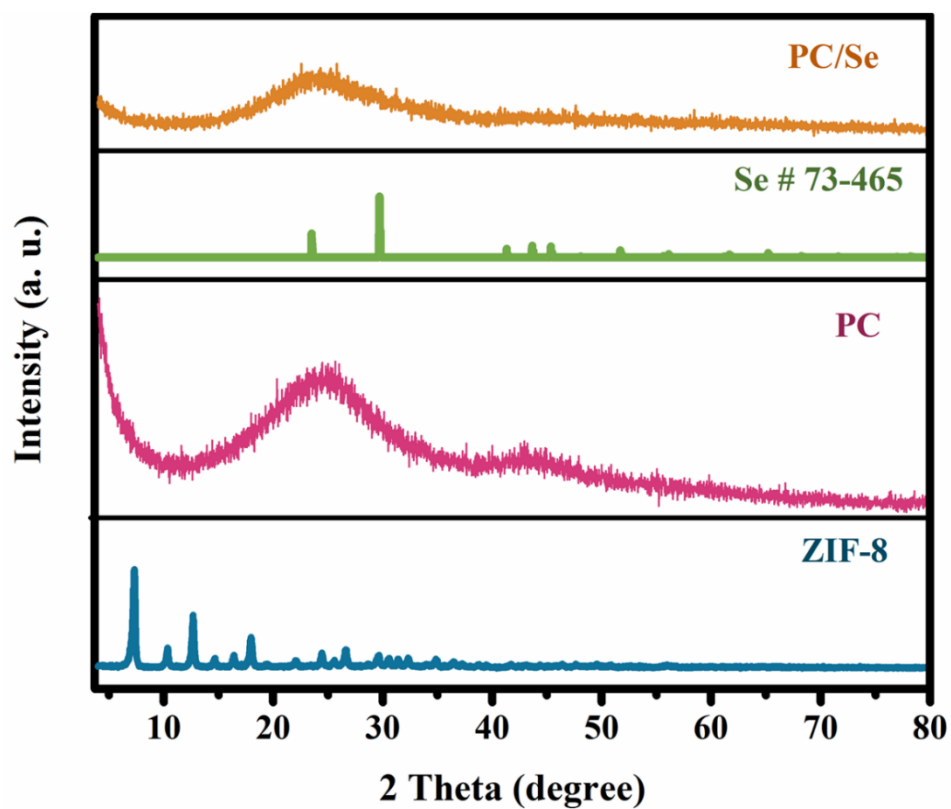

**Figure S8.** XRD patterns of ZIF-8, PC and PC/Se. pore size distributions using DFT analysis of PC and PC/Se, respectively.

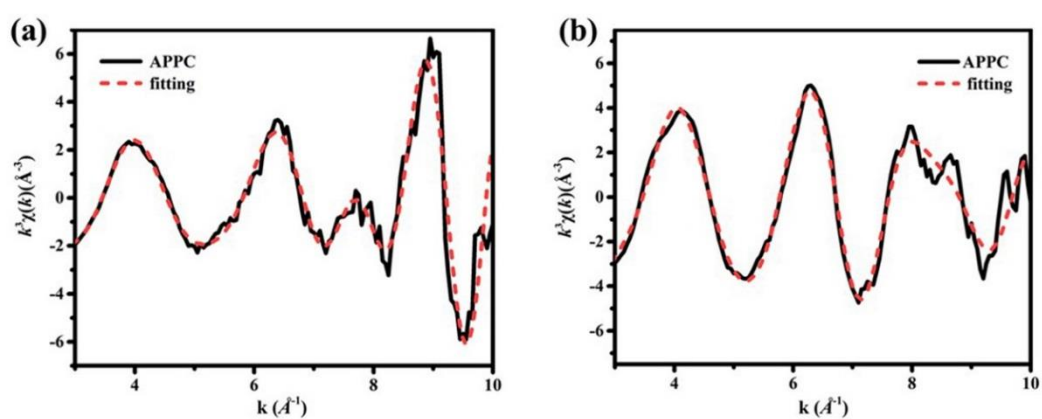

**Figure S9.** (a) Co K-edge EXAFS k-plot fitting curves and (b) Fe K-edge EXAFS k-plot fitting curves.

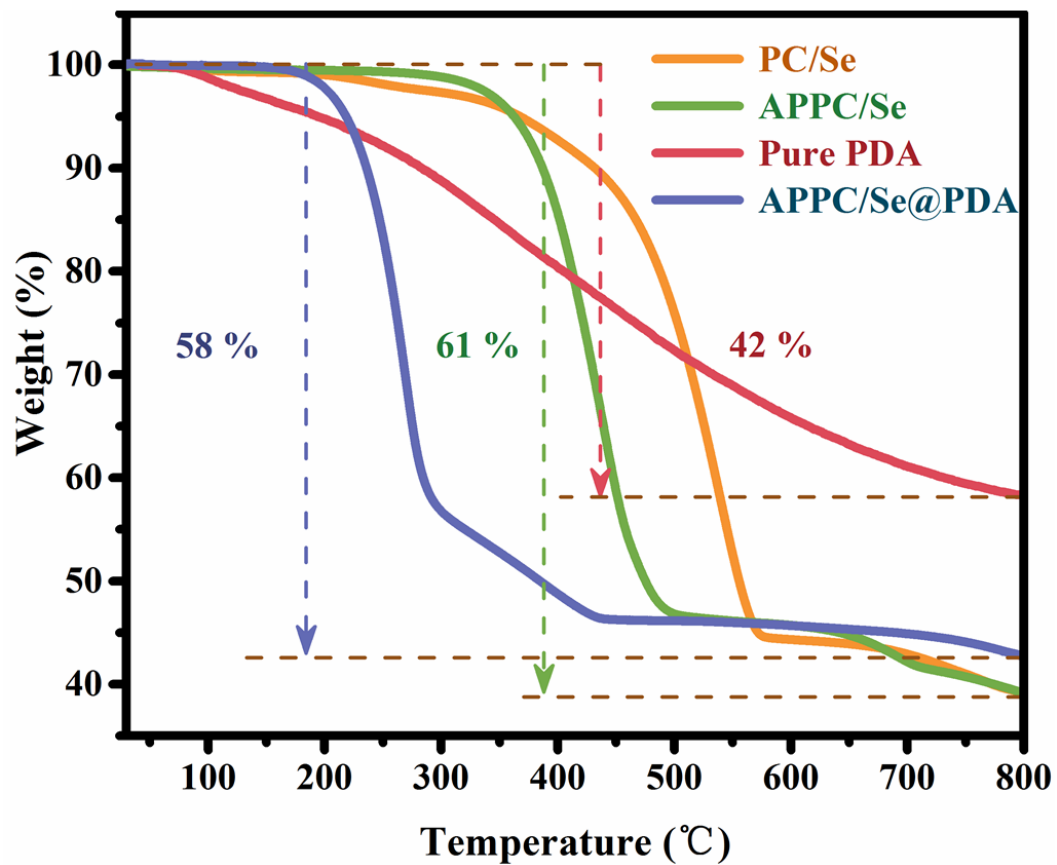

Figure S10. TG curves of APPC/Se@PDA, APPC/Se, PC/Se and pure PDA.

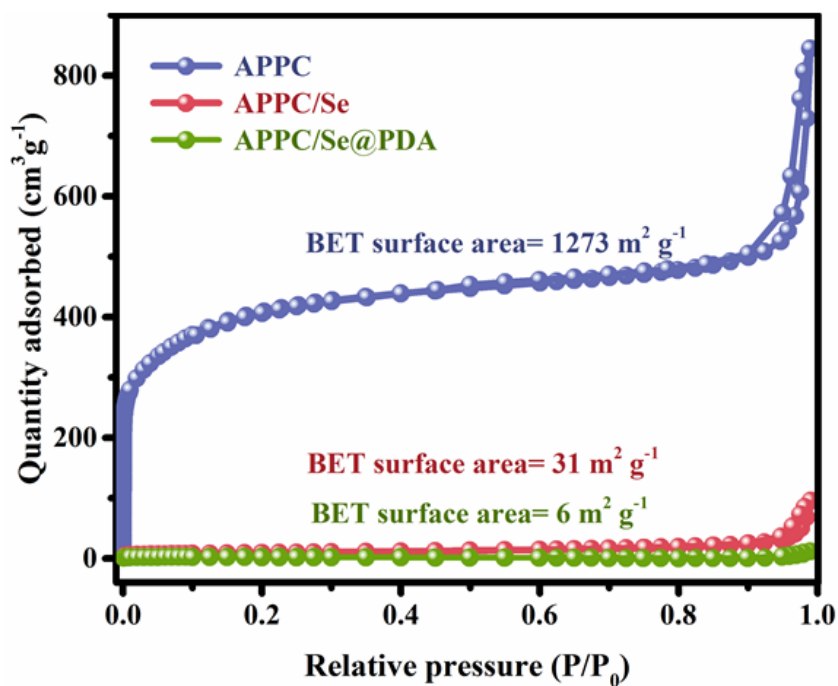

**Figure S11.** (a)  $N_2$  adsorption-desorption isotherms of APPC, APPC/Se and APPC/Se@PDA.

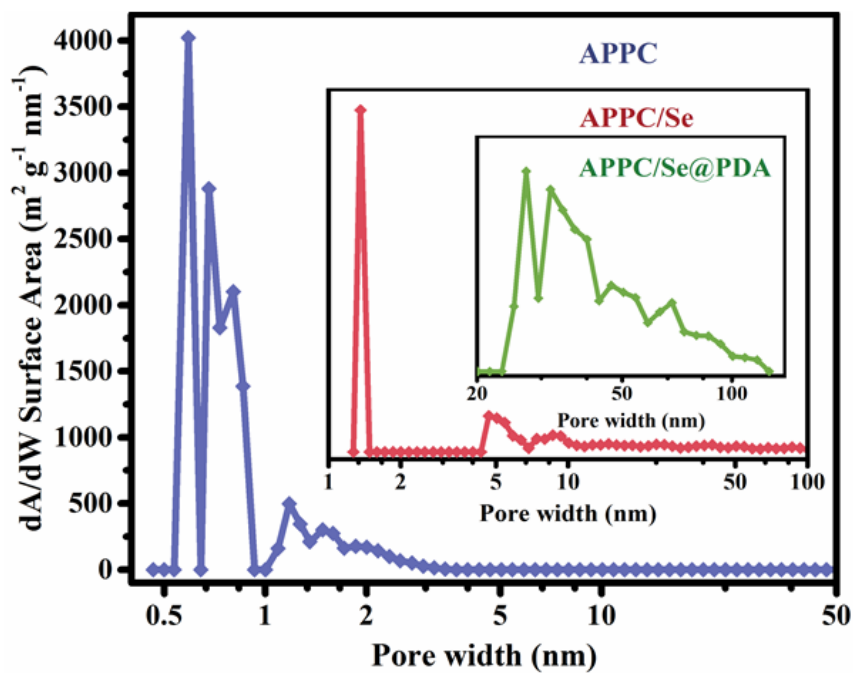

**Figure S12.** Pore size distributions using DFT analysis of APPC, APPC/Se and APPC/Se@PDA, respectively.



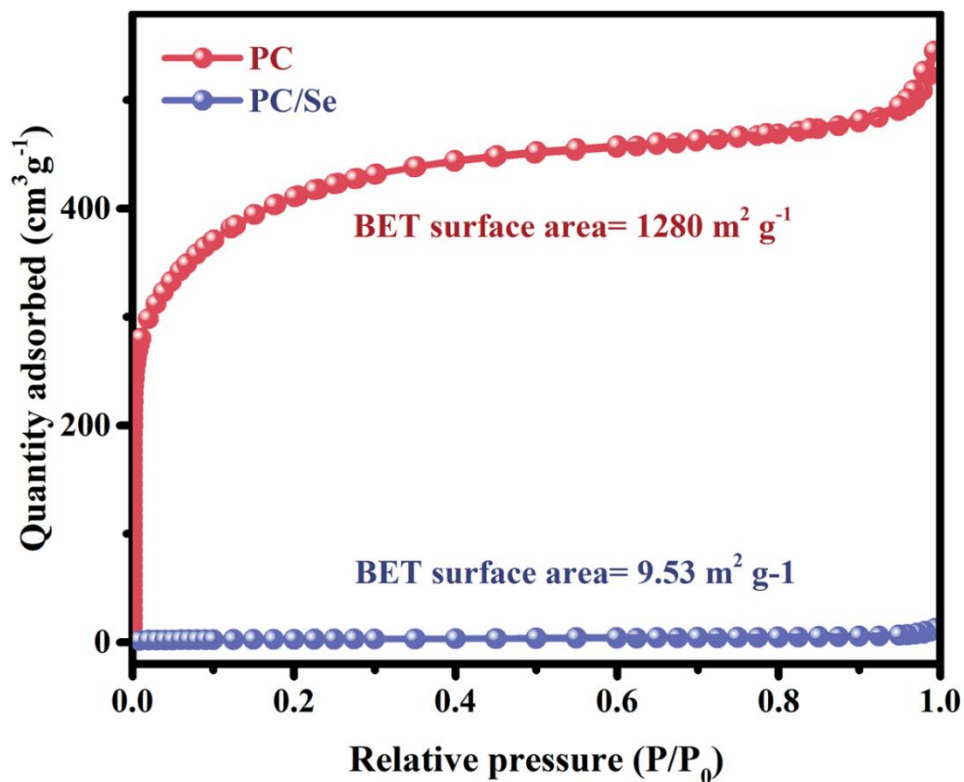

Figure S13.  $\text{N}_2$  adsorption-desorption isotherms of PC and PC/Se.

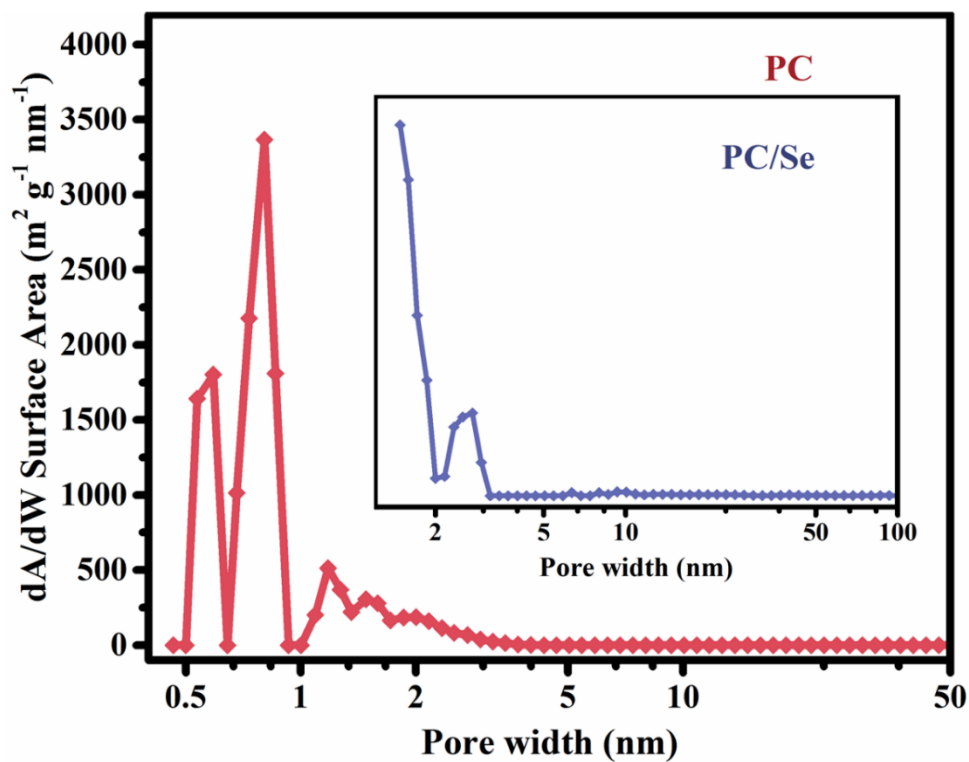

Figure S14. Pore size distributions using DFT analysis of PC and PC/Se.

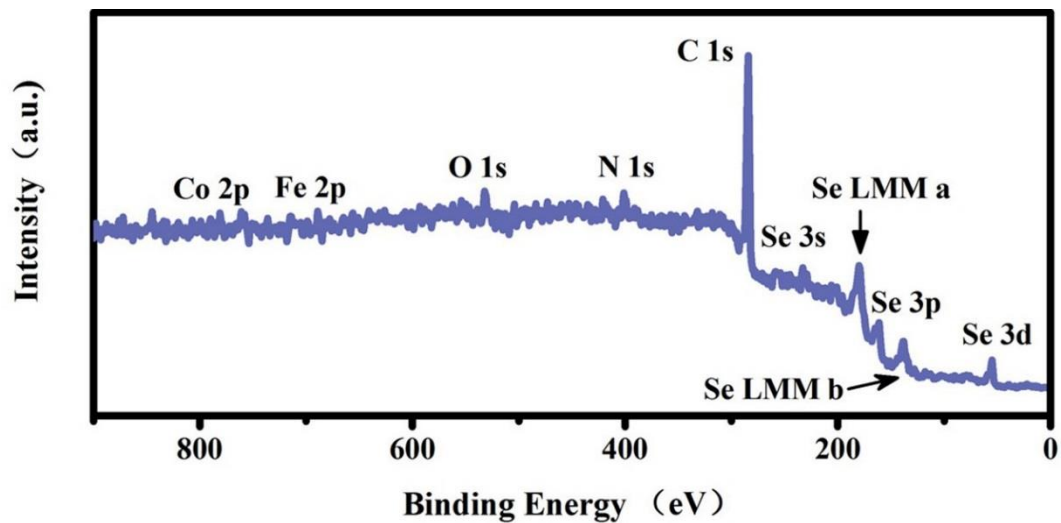

Figure S15. XPS survey spectra of APCC/Se.

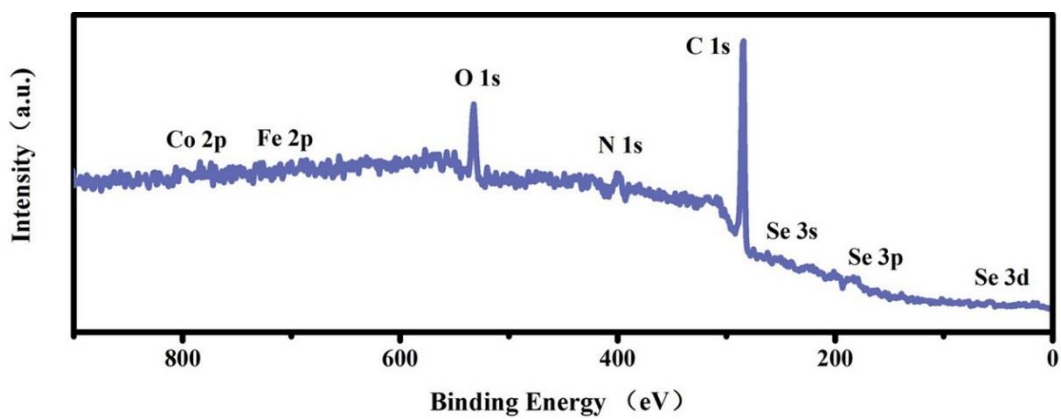

Figure S16. XPS survey spectra of APCC/Se@PDA.

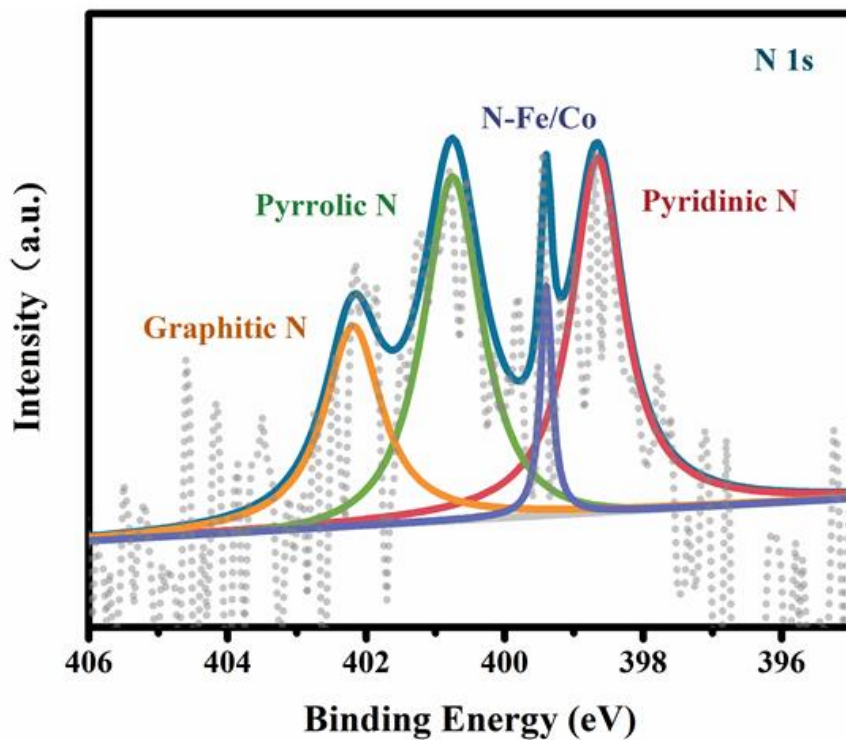

Figure S17. N 1s XPS survey spectra of APPC/Se.

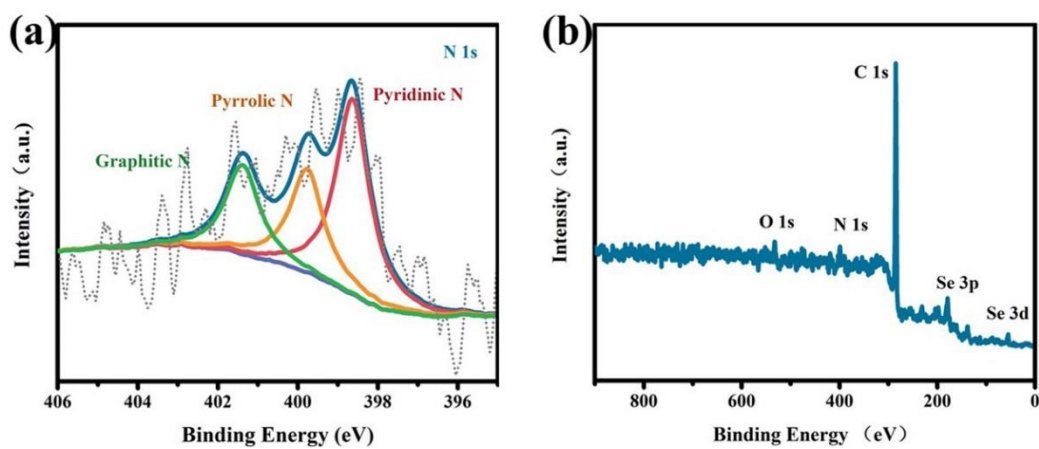

Figure S18. (a) N 1s and (b) XPS survey spectra of PC/Se.

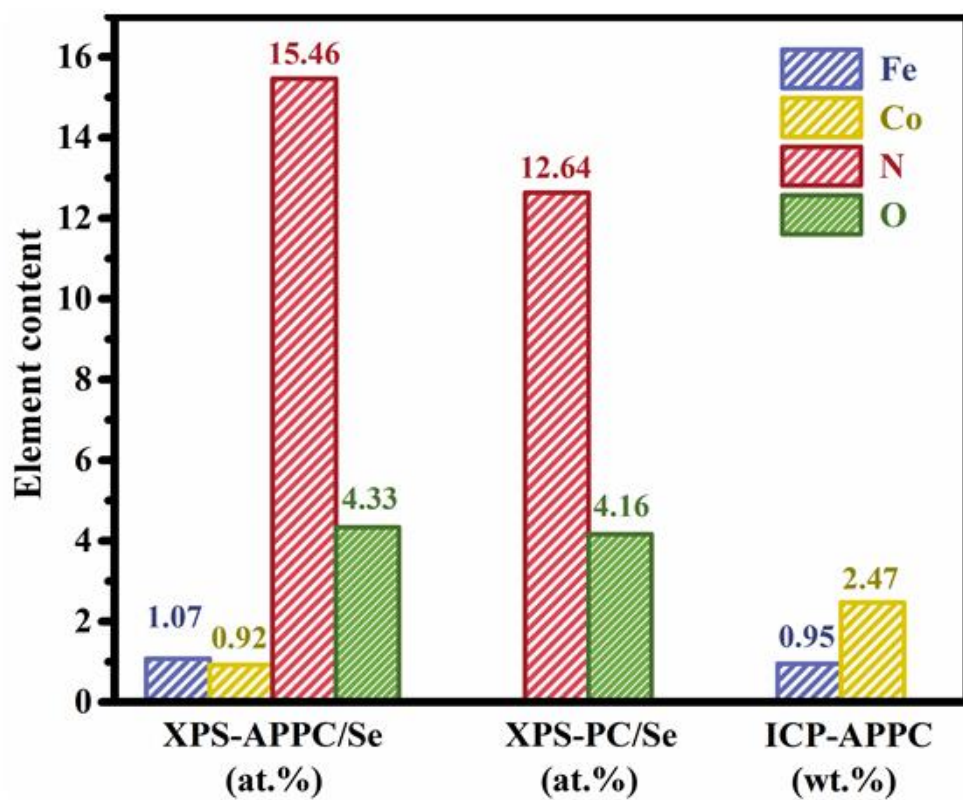

**Figure S19.** Element contents measured by XPS and Inductively Coupled Plasma Optical Emission Spectrometry (ICP-OES).

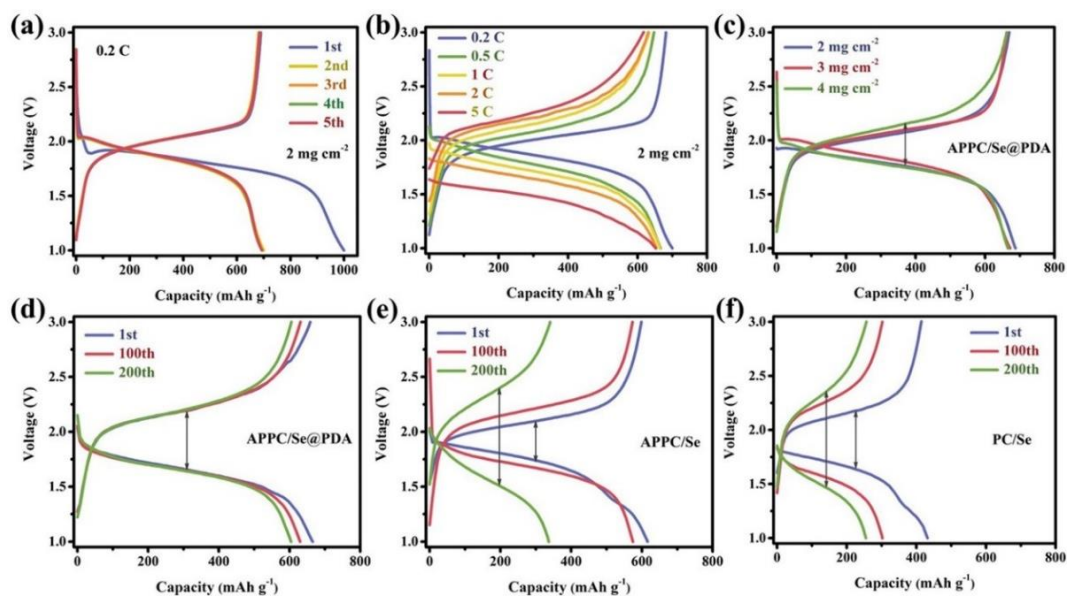

**Figure S20.** Typical voltage profiles of APPC/Se@PDA cathode (a) for 1-5 cycles at 0.2 C, (b) from 0.2 to 5 C at a selenium loading of 2 mg cm<sup>-2</sup> and (c) at 0.5 C for three different Se loadings. Typical voltage profiles at 2 C for 1st cycle, 100th cycle and 200th cycle of (d) APPC/Se@PDA, (e) APPC/Se and (f) PC/Se cathodes at a Se loading of 2 mg cm<sup>-2</sup>, respectively.

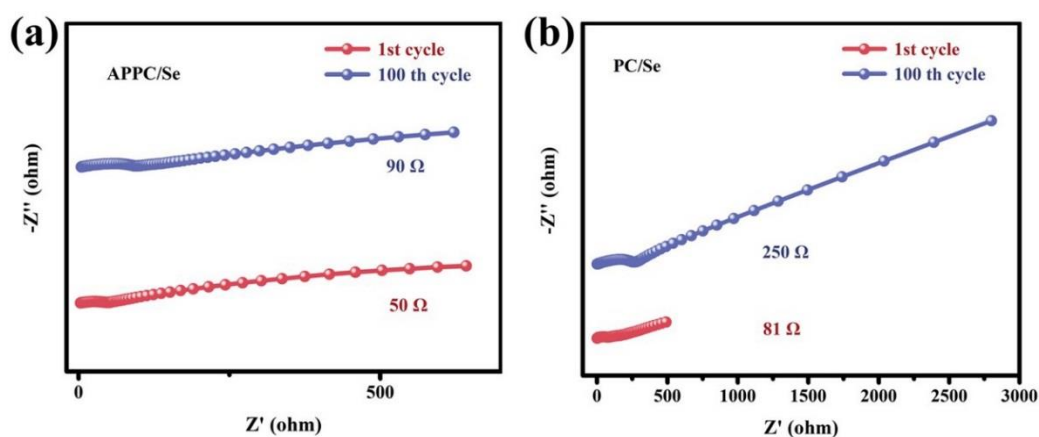

**Figure S21.** Nyquist plots of (a) APPC/Se and (b) PC/Se cathodes after 1st cycle and 100th cycle, respectively.



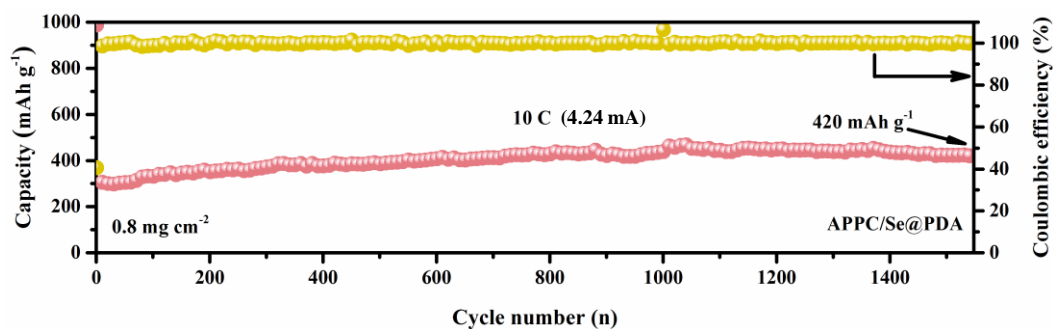

**Figure S22.** Cycling performance at 10 C of APPC/Se@PDA cathode.

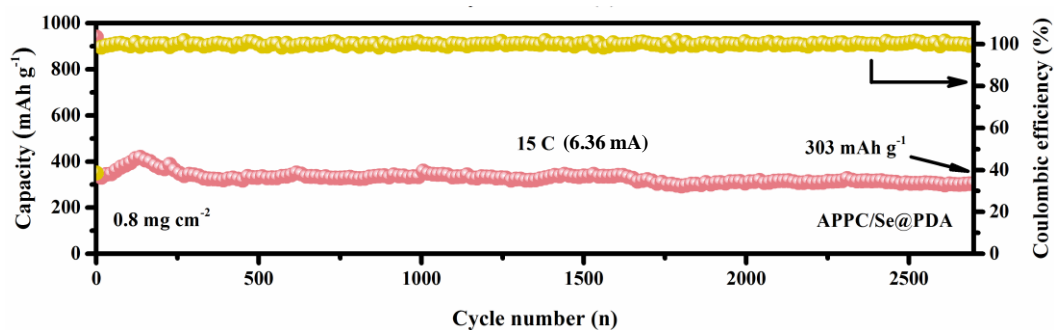

**Figure S23.** Cycling performance at 15 C of APPC/Se@PDA cathode.

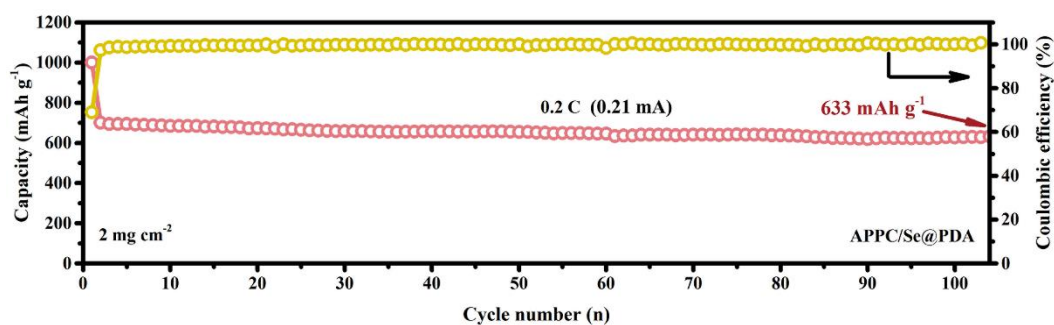

**Figure S24.** Cycling performance at 0.2 C of APPC/Se@PDA cathode at a Se loading of  $2 \text{ mg cm}^{-2}$ .

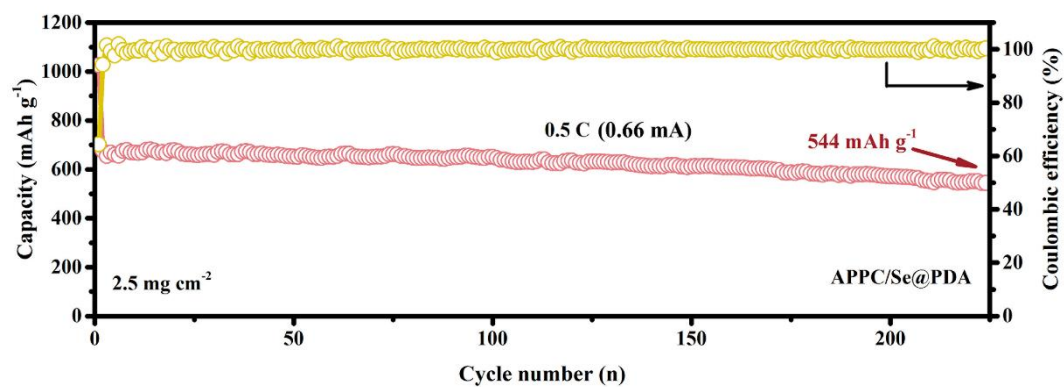

**Figure S25.** Cycling performance at 0.5 C of APPC/Se@PDA cathode at a Se loading of  $2.5 \text{ mg cm}^{-2}$ .

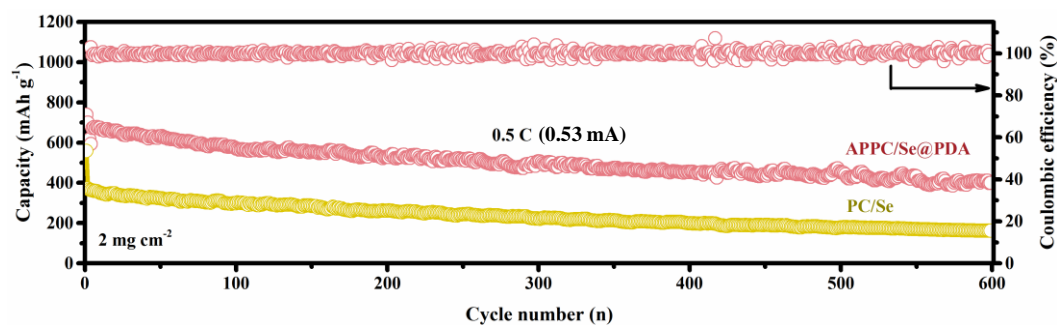

**Figure S26.** Cycling performance at 0.5 C of APPC/Se and APPC/Se@PDA cathodes.

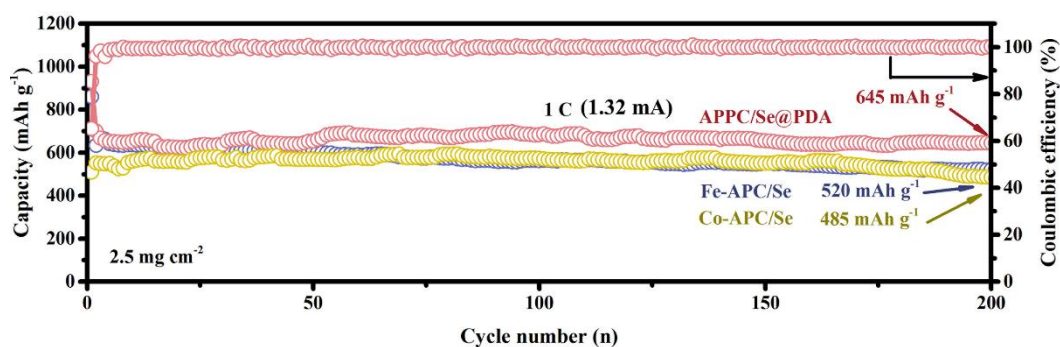

**Figure S27.** Cycling performance at 1 C of APPC/Se@PDA, Fe-APC/Se and Co-APC/Se cathodes at a Se loading of  $2.5 \text{ mg cm}^{-2}$ .

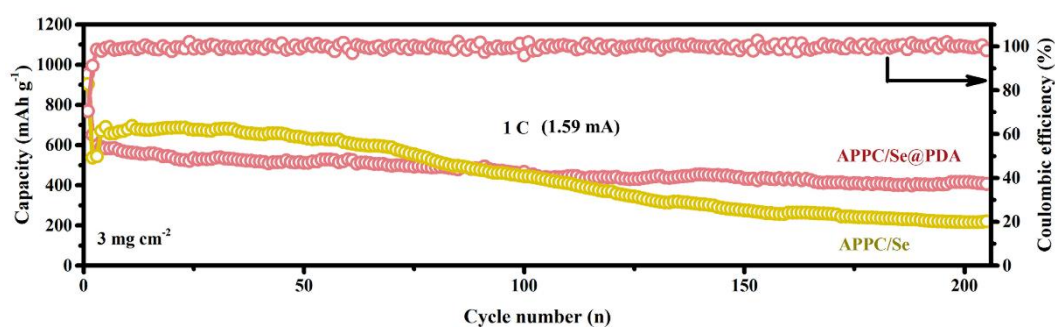

**Figure S28.** Cycling performance at 1 C of APPC/Se@PDA and APPC/Se cathodes at a Se loading of  $3 \text{ mg cm}^{-2}$ .

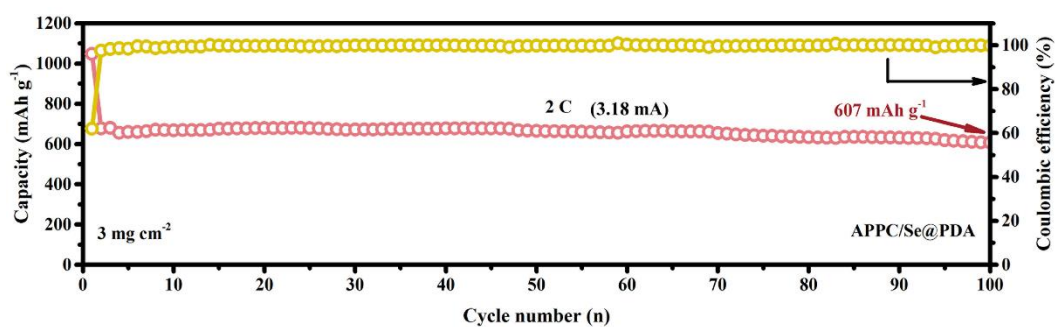

**Figure S29.** Cycling performance at 2 C of APPC/Se@PDA cathode at a Se loading of  $3 \text{ mg cm}^{-2}$ .

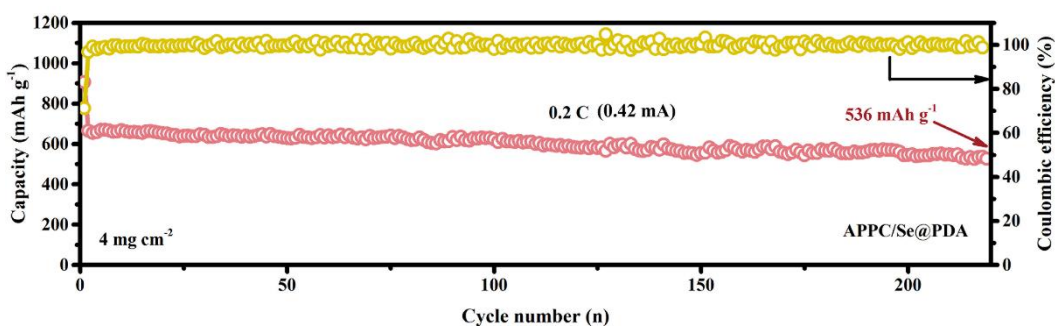

**Figure S30.** Cycling performance at 0.2 C of APPC/Se@PDA cathodes at a Se loading of  $4 \text{ mg cm}^{-2}$ .

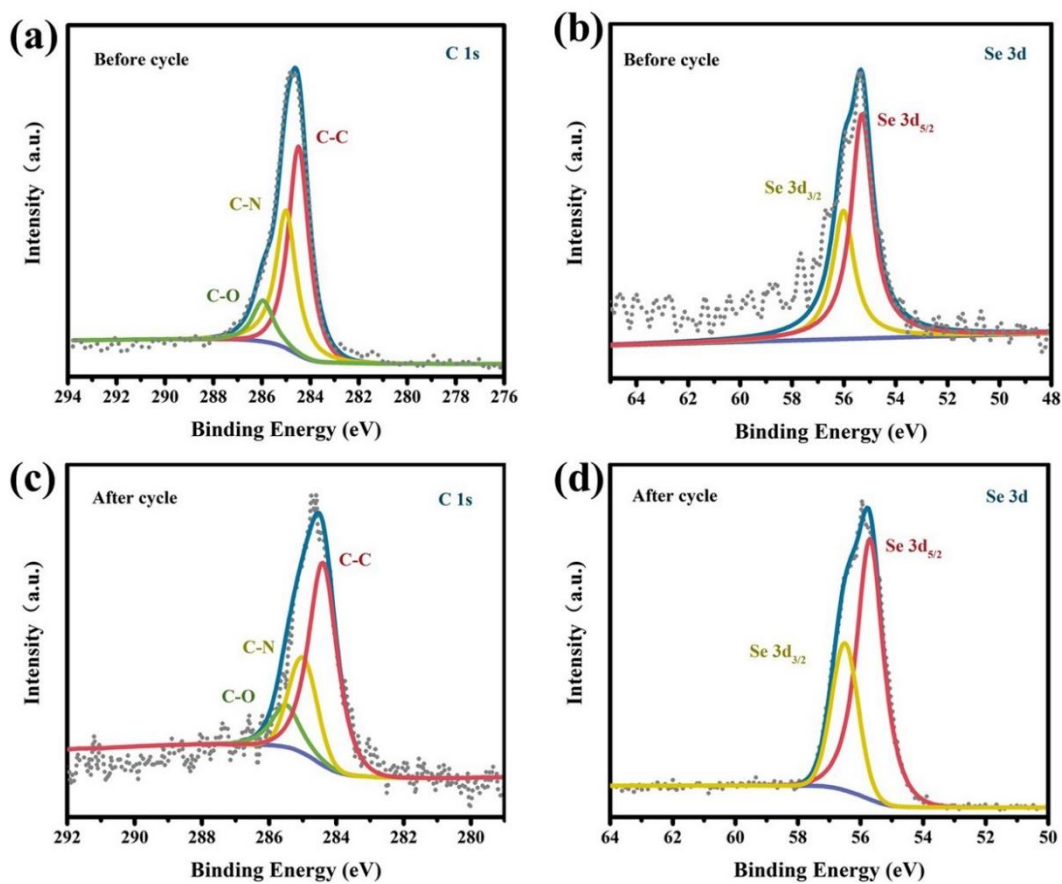

**Figure S31.** The ex-situ (a)(c) C 1s and (b)(d) Se 3d XPS spectra of PC/Se cathode.

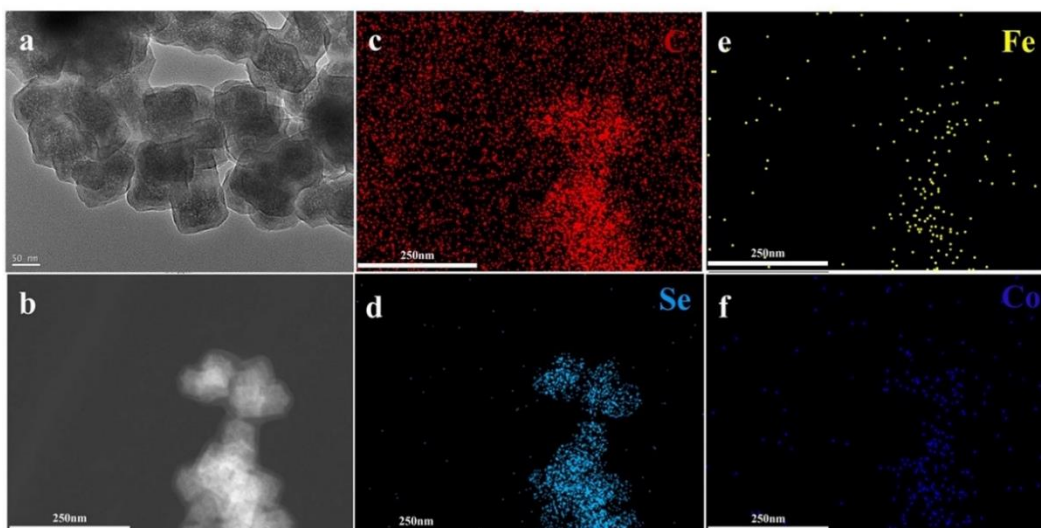

**Figure S32.** (a)(b)The TEM images of APPC/Se@PDA cathode after 600 cycles and (c) the EDS elemental mapping corresponding to (b).

**Table S1.** EXAFS data fitting results of APPC.

| Edge | Path              | N | R(Å) | $\sigma^2(\text{Å}^2)$ |
|------|-------------------|---|------|------------------------|
| Fe   | Fe-N <sub>1</sub> | 2 | 2.00 | 0.003                  |
|      | Fe-N <sub>2</sub> | 2 | 2.09 | 0.004                  |
| Co   | Co-N <sub>1</sub> | 2 | 1.94 | 0.003                  |
|      | Co-N <sub>2</sub> | 1 | 2.00 | 0.003                  |
|      | Co-Co             | 1 | 2.39 | 0.002                  |

N: coordination number;

R: distance between absorber and backscatter atoms;

$\sigma^2$ : the Debye-Waller factor value.

**Table S2.** The calculation of selenium content in APPC/Se@PDA.

|                                     |     |
|-------------------------------------|-----|
| $W_{\text{APPC/Se in APPC/Se@PDA}}$ | x   |
| $W_{\text{PDA in APPC/Se@PDA}}$     | y   |
| $W_{\text{Se in APPC/Se}}$          | 61% |
| $W_{\text{loss of pure PDA}}$       | 42% |
| $W_{\text{loss of APPC/Se@PDA}}$    | 58% |

From above we conclude that  $x+y=1$  and  $61\%*x+42\%*y=58\%$ , so  $x=16\%$  and  $y=84\%$ .

As a result, the content of Se in APPC/Se@PDA is  $84\%*61\%=51\%$ .



**Table S3.** Comparison of electrochemical performance of various carbon hosts as Se cathodes reported for Li-Se batteries with the APPC/Se@PDA cathode in this work.

| Samples            | Se loading (mg cm <sup>-2</sup> ) | Current density | Capacity (mAh g <sup>-1</sup> ) | Cycle number | Ref.             |
|--------------------|-----------------------------------|-----------------|---------------------------------|--------------|------------------|
| <b>APPC/Se@PDA</b> | <b>0.8</b>                        | <b>2 C</b>      | <b>645</b>                      | <b>700</b>   | <b>This work</b> |
|                    |                                   | <b>5 C</b>      | <b>500</b>                      | <b>1400</b>  |                  |
|                    |                                   | <b>10 C</b>     | <b>420</b>                      | <b>1500</b>  |                  |
|                    |                                   | <b>15 C</b>     | <b>303</b>                      | <b>2700</b>  |                  |
|                    |                                   | <b>23 C</b>     | <b>274</b>                      | <b>2500</b>  |                  |
|                    | <b>2</b>                          | <b>0.5 C</b>    | <b>400</b>                      | <b>600</b>   |                  |
|                    | <b>4</b>                          | <b>0.2 C</b>    | <b>536</b>                      | <b>220</b>   |                  |
| Se@CosA-HC         | 0.8                               | 5 C             | 340                             | 1500         | Ref.1            |
|                    |                                   | 20 C            | 237                             | 2500         |                  |
| A4-carbon/Se       | 0.4                               | 3 C             | 343                             | 2000         | Ref.2            |
| NPC/CGB-Se         | 0.4                               | 15 C            | 409                             | 10           | Ref.3            |
|                    | 1.8                               | 0.5 C           | 380                             | 90           |                  |
| MiC/Se             | 1.8                               | 0.5 C           | 400                             | 500          | Ref.4            |
|                    | 2.2                               | 0.5 C           | 348                             | 500          |                  |
| PANI@Se/C-G        | 2                                 | 0.2 C           | 588.7                           | 200          | Ref.5            |
|                    |                                   | 2 C             | 528.6                           | 500          |                  |
|                    |                                   | 5 C             | 403                             | 500          |                  |
| BP-CNF/Se          | 0.4                               | 0.5 C           | 588                             | 300          | Ref.6            |
| Se-NCHPC           | 0.7                               | 2 C             | 305                             | 60           | Ref.7            |
| Se/MMPBc-3         | 1.3                               | 0.2 C           | 467                             | 300          | Ref.8            |
| Se-CP              | -                                 | 1 C             | 506                             | 150          | Ref.9            |
| Se/CMK-3           | -                                 | 1 C             | 304                             | 500          | Ref.10           |
| Se/MCN-RGO         | 1.2                               | 1 C             | 385                             | 1300         | Ref.11           |
| Se/CMCs            | 1                                 | 0.5 C           | 231                             | 460          | Ref.12           |
|                    |                                   | 2 C             | 166                             | 460          |                  |

1. H. Tian, H. Tian, S. Wang, S. Chen, F. Zhang, L. Song, H. Liu, J. Liu and G. Wang, *Nat. Commun.*, 2020, **11**, 5025.
2. G. D. Park, J. H. Kim, J.-K. Lee and Y. Chan Kang, *J. Mater. Chem. A*, 2018, **6**, 21410-21418.
3. S. K. Park, J. S. Park and Y. C. Kang, *ACS Appl. Mater. Interfaces*, 2018, **10**, 16531-16540.
4. X. Wang, Y. Tan, Z. Liu, Y. Fan, M. Li, H. A. Younus, J. Duan, H. Deng and S. Zhang, *Small*, 2020, **16**, e2000266.
5. B. Wang, J. Zhang, Z. Xia, M. Fan, C. Lv, G. Tian and X. Li, *Nano Res.*, 2018, **11**, 2460-2469.
6. S.-K. Park, J.-S. Park and Y. C. Kang, *J. Mater. Chem. A*, 2018, **6**, 1028-1036.
7. Y. Qu, Z. Zhang, S. Jiang, X. Wang, Y. Lai, Y. Liu and J. Li, *J. Mater. Chem. A*, 2014, **2**, 12255-12261.
8. H. Zhang, F. Yu, W. Kang and Q. Shen, *Carbon*, 2015, **95**, 354-363.
9. Z. Yi, L. Yuan, D. Sun, Z. Li, C. Wu, W. Yang, Y. Wen, B. Shan and Y. Huang, *J. Mater. Chem. A*, 2015, **3**, 3059-3065.
10. C. P. Yang, S. Xin, Y. X. Yin, H. Ye, J. Zhang and Y. G. Guo, *Angew. Chem. Int. Ed.*, 2013, **52**, 8363-8367.
11. K. Han, Z. Liu, J. Shen, Y. Lin, F. Dai and H. Ye, *Adv. Funct. Mater.*, 2015, **25**, 455-463.
12. T. Liu, M. Jia, Y. Zhang, J. Han, Y. Li, S. Bao, D. Liu, J. Jiang and M. Xu, *J. Power Sources*, 2017, **341**, 53-59.
